# Supplementary material
Source: HighWire-hosted journal article supplement (https://bmjopen.bmj.com/content/9/5/e027739)
Supplement: inline-supplementary-material-1 [file inline-supplementary-material-1.pdf]

## 1 Supplementary Material

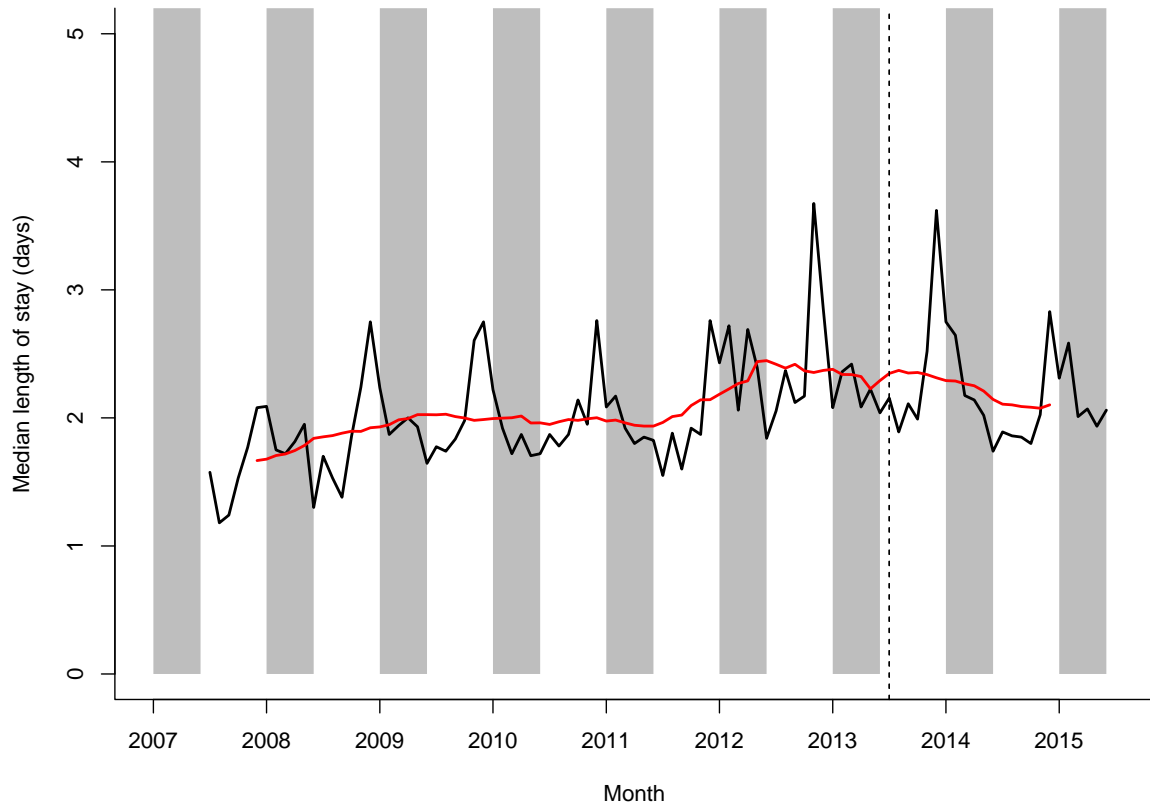

2

3 **Supplementary Figure 1. Median length of stay (all admissions) on general medical wards in Alder**  
4 **Hey Children's NHS Foundation Trust, July 2007 – June 2015.** Raw data in black, smoothed data in  
5 red. Grey shading represents the rotavirus season (January-May). The vertical hashed line represents  
6 the introduction of rotavirus vaccine in the UK in July 2013.

7 *NHS: National Health Service.*

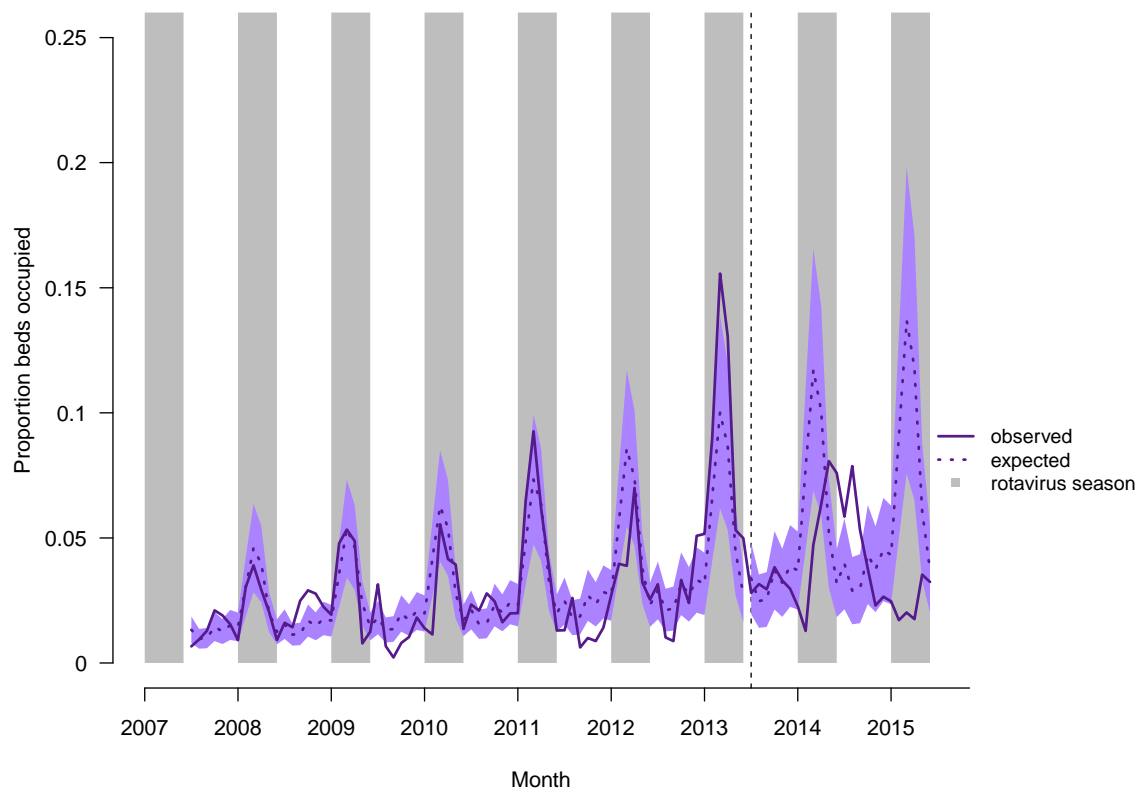

1

2 **Supplementary Figure 2. Observed and expected bed occupancy for acute gastroenteritis on**  
 3 **general medical wards in Alder Hey NHS Foundation Trust, July 2007 – June 2015.** The coloured  
 4 shading represents the 95% confidence intervals for the expected incidence. Grey shading  
 5 represents the rotavirus season (January-May). The vertical hashed line represents the introduction  
 6 of rotavirus vaccine in the UK in July 2013.

7 *NHS: National Health Service.*

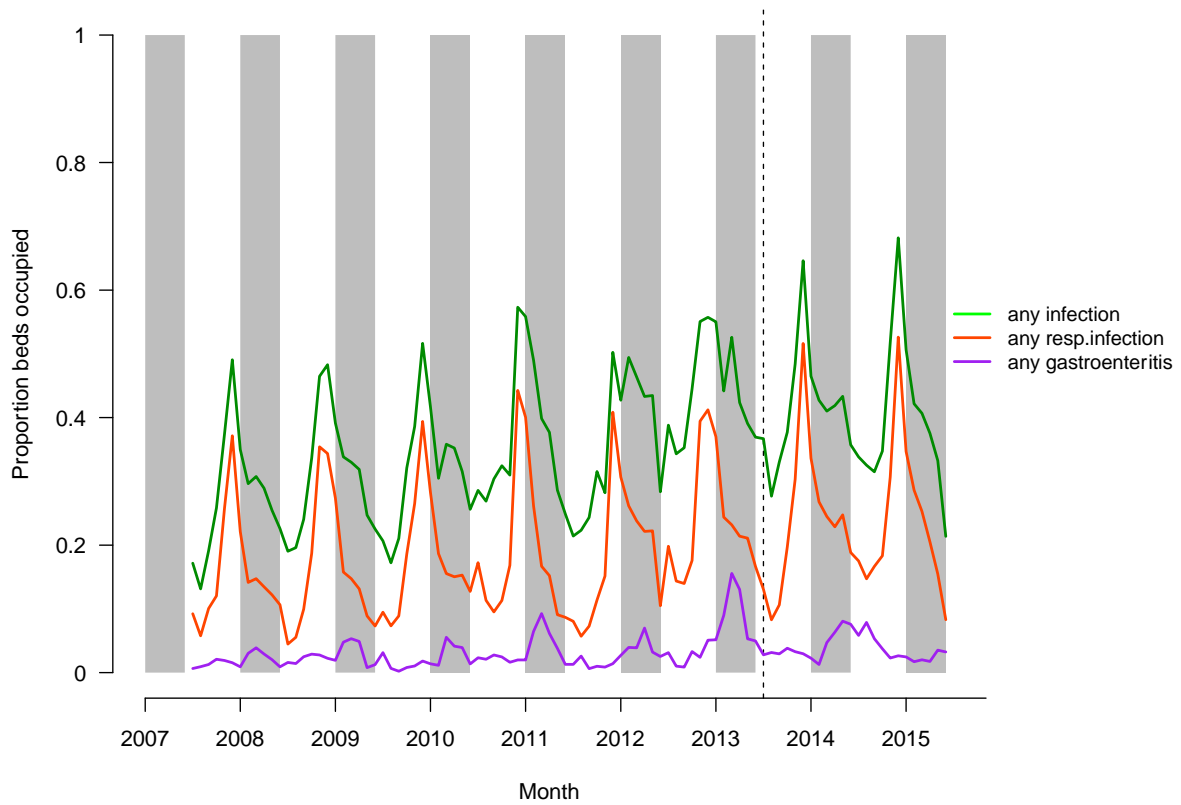

1

2 **Supplementary Figure 3. Observed bed occupancy for any infection, any respiratory infection and**  
 3 **any gastroenteritis (by clinical coding only) in general medical wards in Alder Hey NHS Foundation**  
 4 **Trust, July 2007 – June 2015.** The vertical hashed line represents the introduction of rotavirus  
 5 vaccine in the UK in July 2013.

6 *NHS: National Health Service; resp.: respiratory.*

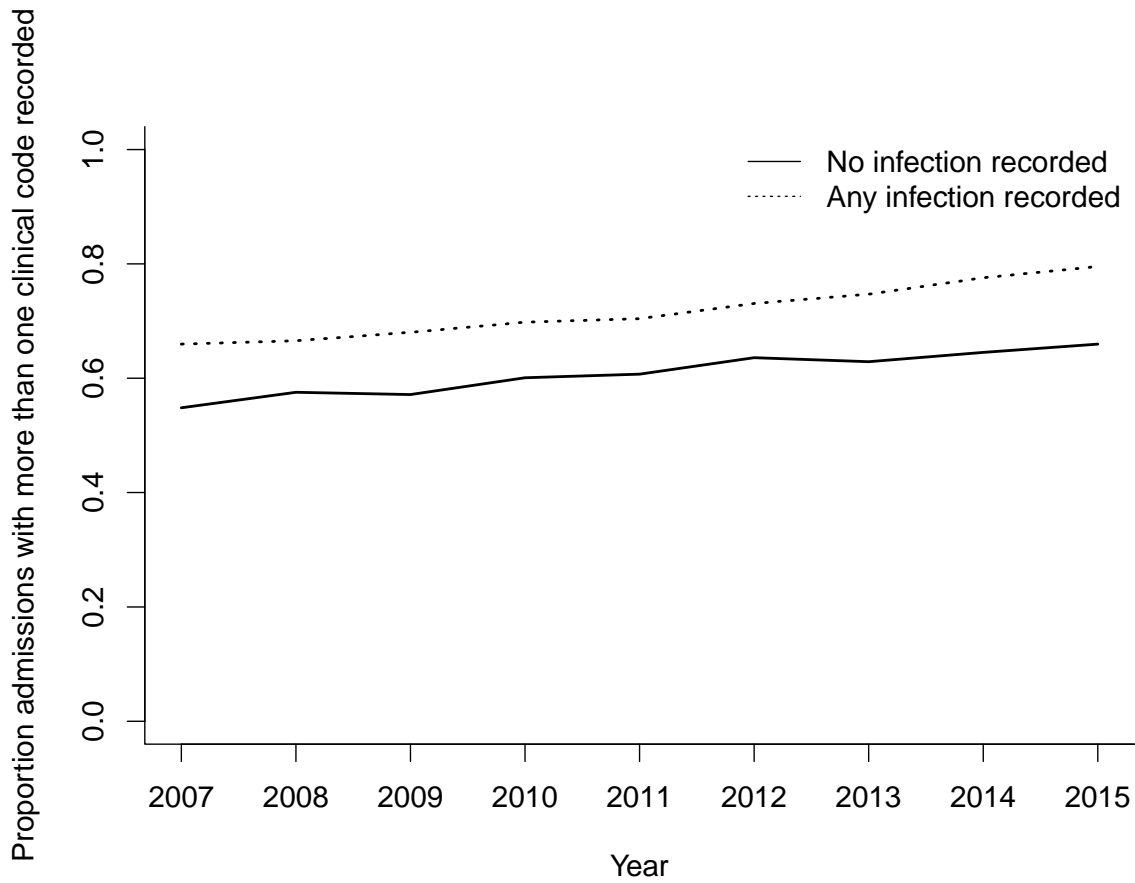

1

2 **Supplementary Figure 4. Proportion of admissions to general medical wards for whom more than**  
 3 **one clinical code was recorded, Alder Hey NHS Foundation Trust, July 2007 – June 2015**

4 *NHS: National Health Service.*
